# Supplementary material for: QTL Analysis for Chlorophyll Content in Strawberry (Fragaria × ananassa Duch.) Leaves
Source: MDPI journal article supplement (doi:10.3390/agriculture11111163), 2021-11-18
Supplement: s1 [file s1]

**Table S1.** Genetic variation among BS-F<sub>2</sub> and BC-F<sub>2</sub> populations evaluated for the chlorophyll content via SPAD meter.

| Population        | Traits      | Mean $\pm$ SE    | Range (Max-Min) | CV (%) | h <sup>2</sup> (Broad Sense)<br>(%) | Expected genetic advancement |
|-------------------|-------------|------------------|-----------------|--------|-------------------------------------|------------------------------|
| BS-F <sub>2</sub> | Chlorophyll | 46.31 $\pm$ 3.42 | 34.1-57.4       | 12.77  | 43.9                                | 25.4                         |
| BC-F <sub>2</sub> | Chlorophyll | 45.95 $\pm$ 4.10 | 20.9-62.3       | 15.45  | 55.44                               | 26.4                         |

**Table S2.** Summary of the bins and genetic linkage map for the BC-F<sub>2</sub> population.

| LG     | No of bin markers | Length (cM) | Bin density/cM |
|--------|-------------------|-------------|----------------|
| LG1-1a | 33                | 23.9        | 0.7            |
| LG1-1b | 2                 | 0.3         | 0.2            |
| LG1-2  | 54                | 173.5       | 3.2            |
| LG1-3  | 100               | 153.3       | 1.5            |
| LG1-4a | 59                | 228.7       | 3.9            |
| LG1-4b | 3                 | 1.3         | 0.4            |
| LG2-1a | 64                | 124.4       | 1.9            |
| LG2-1b | 12                | 18.7        | 1.6            |
| LG2-1c | 4                 | 1.6         | 0.4            |
| LG2-2a | 31                | 106         | 3.4            |
| LG2-2b | 16                | 17.3        | 1.1            |
| LG2-2c | 8                 | 3.8         | 0.5            |
| LG2-3a | 54                | 154.7       | 2.9            |
| LG2-3b | 22                | 44.6        | 2.0            |
| LG2-3c | 22                | 44.6        | 2.0            |
| LG3-1a | 69                | 107.8       | 1.6            |
| LG3-1b | 2                 | 0.3         | 0.2            |
| LG3-2  | 33                | 105.2       | 3.2            |
| LG3-3a | 20                | 61.6        | 3.1            |
| LG3-3b | 60                | 75.8        | 1.3            |
| LG3-3c | 12                | 35.5        | 3.0            |
| LG3-4  | 51                | 106.5       | 2.1            |
| LG4-1  | 54                | 102.5       | 1.9            |
| LG4-2a | 58                | 101.1       | 1.7            |
| LG4-2b | 5                 | 1.5         | 0.3            |
| LG4-2c | 6                 | 6.7         | 1.1            |
| LG4-3a | 46                | 147.2       | 3.2            |
| LG4-3b | 13                | 42.5        | 3.3            |
| LG4-4a | 22                | 23.8        | 1.1            |
| LG4-4b | 2                 | 0.3         | 0.2            |
| LG5-1a | 17                | 14          | 0.8            |
| LG5-1b | 47                | 99.2        | 2.1            |
| LG5-2  | 47                | 79.3        | 1.7            |
| LG5-3a | 57                | 128.6       | 2.3            |
| LG5-3b | 46                | 112.8       | 2.5            |
| LG5-4a | 51                | 122.7       | 2.4            |
| LG5-4b | 18                | 14.1        | 0.8            |
| LG6-1a | 55                | 107.7       | 2.0            |
| LG6-1b | 15                | 56.6        | 3.8            |
| LG6-1c | 3                 | 1.9         | 0.6            |
| LG6-2a | 59                | 127.9       | 2.2            |

|        |      |        |     |
|--------|------|--------|-----|
| LG6-2b | 6    | 3.7    | 0.6 |
| LG6-3a | 50   | 141.9  | 2.8 |
| LG6-3b | 22   | 79.6   | 3.6 |
| LG6-3c | 6    | 9      | 1.5 |
| LG6-3d | 5    | 12.1   | 2.4 |
| LG6-4a | 22   | 37.5   | 1.7 |
| LG6-4b | 22   | 46.5   | 2.1 |
| LG7-1a | 19   | 37.2   | 2.0 |
| LG7-1b | 27   | 48.1   | 1.8 |
| LG7-1c | 9    | 4.6    | 0.5 |
| LG7-2a | 17   | 56.6   | 3.3 |
| LG7-2b | 47   | 142.7  | 3.0 |
| LG7-3a | 26   | 123.7  | 4.8 |
| LG7-3b | 8    | 7.6    | 1.0 |
| LG7-4  | 33   | 90.7   | 2.7 |
| 56     | 1671 | 3721.3 | 1.9 |
